# Supplementary material for: Insights into transcriptional changes that accompany organelle sequestration from the stolen nucleus of Mesodinium rubrum
Source: PubMed Central journal article supplement (PMC4609049; doi:10.1186/s12864-015-2052-9), 2015-10-16

# mRNA Surveillance Pathway

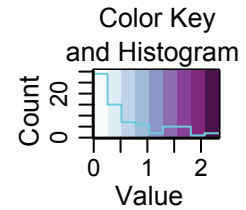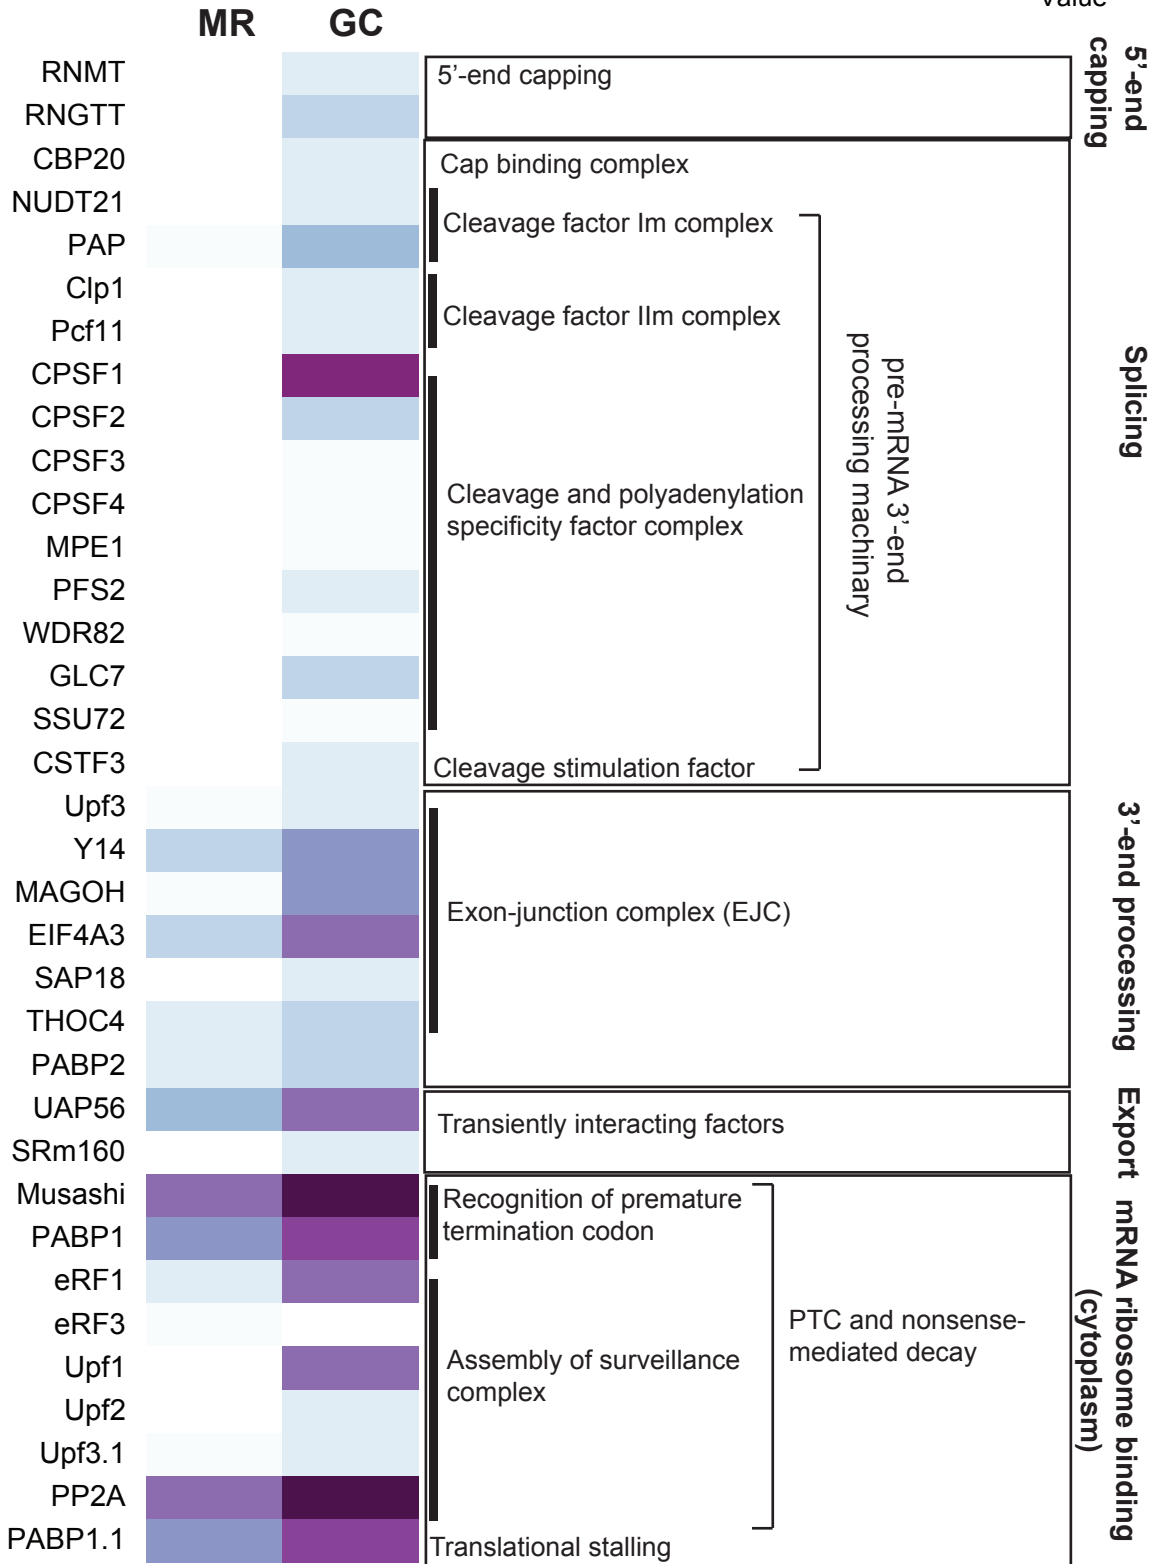

Supplement: 12864_2015_2052_MOESM6_ESM.pdf [file 12864_2015_2052_MOESM6_ESM.pdf]
